# Supplementary material for: Tumor-infiltrating Leukocytes Suppress Local Inflammation Via Interleukin-1 Receptor Antagonist in a Syngeneic Prostate Cancer Model
Source: PubMed Central journal article supplement (PMC7235745; doi:10.3390/biology9040067), 2020-03-31
Supplement: biology-09-00067-s001.pdf [file biology-09-00067-s001.pdf]

1 **Tumor-infiltrating leukocytes suppress local inflammation via interleukin-1 receptor antagonist in**  
2 **a syngeneic prostate cancer model**

3 Yu-Ching Fan, Wei-Yu Chen, Kuan-Der Lee, Yuan-Chin Tsai

4 **Summary:**

5 The supplementary information contains Supplementary Figure S1 and Supplementary Table S1

6 **Supplementary Figure S1**

7 **Validation of Ficoll gradient, angiogenesis in tumor microenvironment, and analysis of clinical**  
8 **datasets**

Supplementary Figure S1

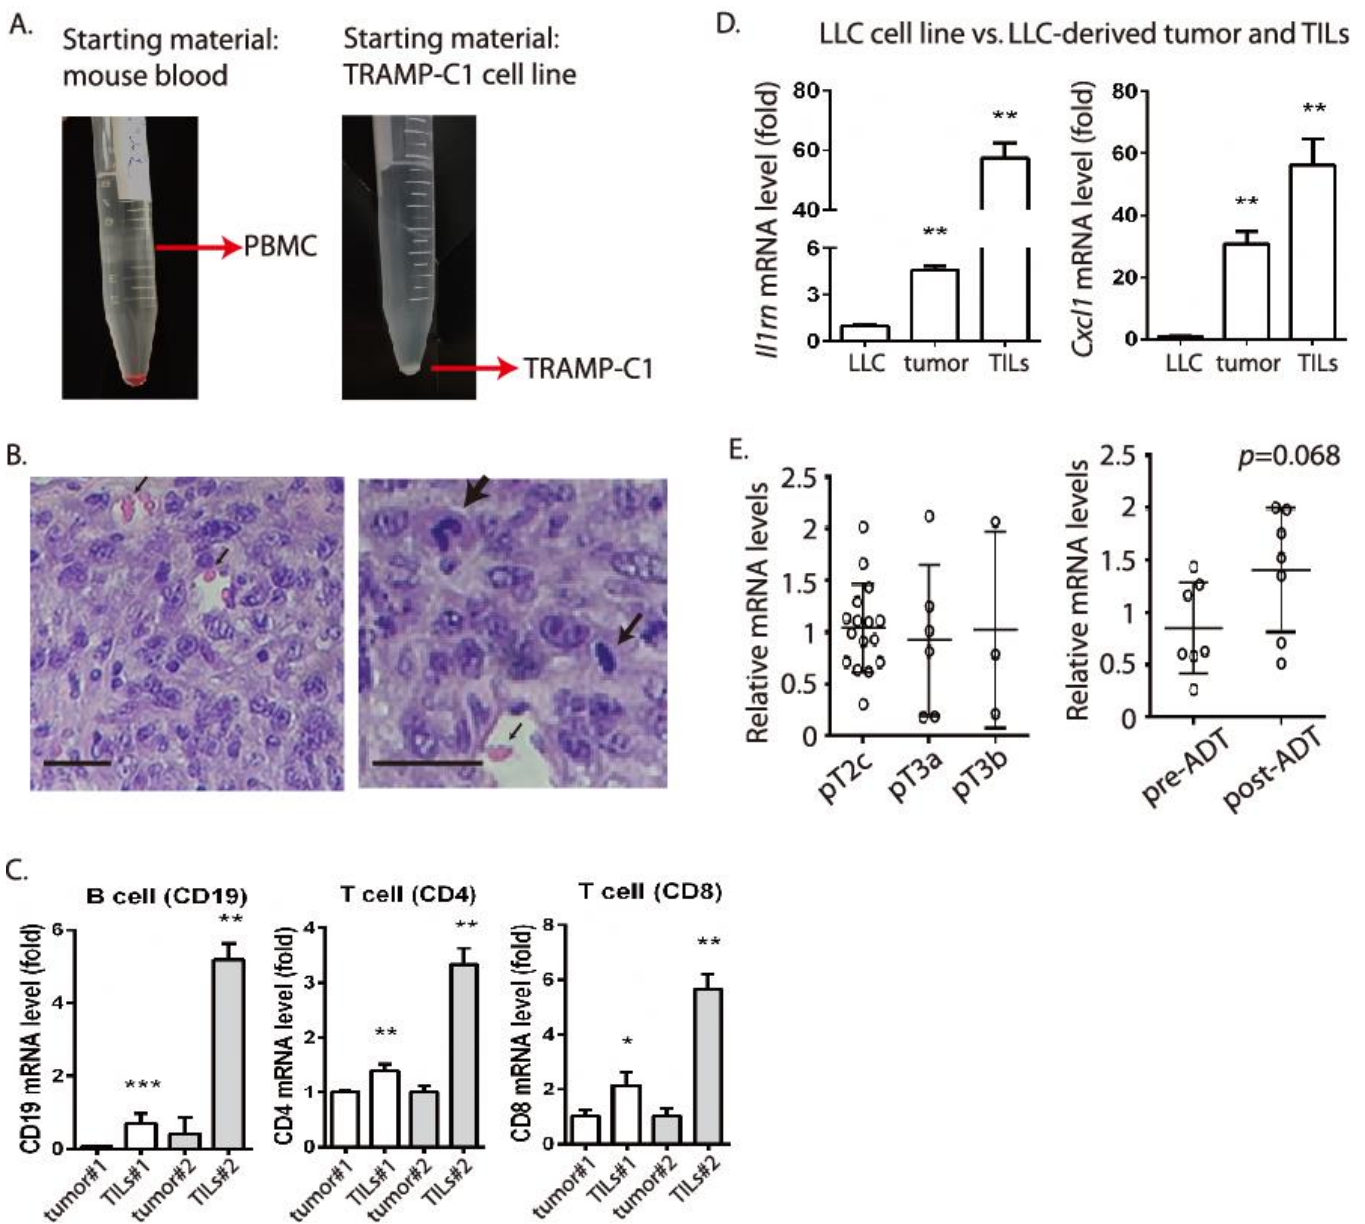

9

1 **Figure legend**

- 2 (A) Validation of Ficoll gradient procedure to separate leukocytes and cancer cells. Left panel: the  
3 peripheral blood mononuclear cells (PBMC) in mouse blood locate in the interphase (red arrow) after  
4 centrifugation. Right panel: TRAMP-C1 cells are pelleted down the bottom of the tube under the  
5 same centrifugation procedure.
- 6 (B) Selected images of tumor tissues (P3-T1, P3-T2) collected from immune competent mice after s.c.  
7 injection of P2-C primary cells. Big arrow: granulocytes with polymorphonuclear feature (left).  
8 Middle arrow: lymphocyte. Small arrows: capillary-like acini containing red blood cells. Scale bar:  
9 10µm.
- 10 (C) Monitoring immune cell markers in tumor-derived samples by measuring B cell marker *Cd19* (left)  
11 and T cell markers *Cd4* (middle) and *Cd8* (right). qPCR measurements were derived from two  
12 replicates and results are presented as the mean ± SD. Student's t-test. \* p<0.05, \*\* p<0.01, \*\*\*  
13 p<0.001.
- 14 (D) Lewis lung cancer (LLC)-derived tumor environment has elevated *Il1rn* and *Cxcl1* expression.  
15 mRNA levels were compared in the LLC cell line (LLC), its tumor tissue (tumor), and its derived  
16 TILs. qPCR measurements were derived from three technical replicates and results are presented as  
17 the mean ± SD. Student's t-test. \* p<0.05, \*\* p<0.01, \*\*\* p<0.001, \*\*\*\* p<0.0001.
- 18 (E) Monitoring *IL1RN* mRNA levels in two clinical datasets. Left panel: 25 human prostate cancer  
19 samples with different tumor stages (pT2c: n=16, pT3a: n=6, pT3b: n=3) (Accession ID: SRP005908).  
20 Right panel: 14 human prostate cancer samples from 7 patients before (pre-ADT) and after (post-  
21 ADT) ADT treatment. (Accession ID: SRP026387).  
22

23 **Supplementary Table**

24 **Supplementary Table S1.** Primer sequences for the qRT-PCR.

| Gene     | 5'-3'                          |
|----------|--------------------------------|
| RELA F   | CCG ACT TGT TTG GGT GAT CT     |
| RELA R   | TCC GTC TCC AGG AGG TTA AT     |
| CCR2 F   | TTA CAC CTG TGG CCC TTA TTT    |
| CCR2 R   | CTG AGT AGC AGA TGA CCA TGA C  |
| CCR4 F   | TCT TCC TGC CTC CTC TCT AC     |
| CCR4 R   | TGG ACT TGA GCC TCT TGT ATT T  |
| IL1RN F  | CAG CTC ATT GCT GGG TAC TT     |
| IL1RN R  | CTC AGA GCG GAT GAA GGT AAA G  |
| CXCL1 F  | GTG TCT AGT TGG TAG GGC ATA AT |
| CXCL1 R  | CAG TCC TTT GAA CGT CTC TGT    |
| CXCL10 F | AGT AAC TGC CGA AGC AAG AA     |

|          |                               |
|----------|-------------------------------|
| CXCL10 R | GCA CCT CCA CAT AGC TTA CA    |
| CCL2 F   | AGT AGG CTG GAG AGC TAC AA    |
| CCL2 R   | GTA TGT CTG GAC CCA TTC CTT C |
| GAPDH F  | TCT CCC TCA CAA TTT CCA TCC   |
| GAPDH R  | GGG TGC AGC GAA CTT TAT TG    |

1

2
